# Supplementary material for: Iron acquisition in Pseudomonas aeruginosa by the siderophore pyoverdine: an intricate interacting network including periplasmic and membrane proteins
Source: PubMed Central journal article supplement (PMC6954188; doi:10.1038/s41598-019-56913-x), 2020-01-10
Supplement: 41598_2019_56913_MOESM1_ESM.pdf [file 41598_2019_56913_MOESM1_ESM.pdf]

## SUPPLEMENTARY MATERIAL

Iron acquisition in *Pseudomonas aeruginosa* by the siderophore pyoverdine: an intricate interacting network including periplasmic and membrane proteins

Anne Bonneau<sup>a,b</sup>, Béatrice Roche<sup>a,b\*</sup>, and Isabelle Schalk<sup>a,b\*</sup>

| Strains                   |               | Characteristics                                                                                                                                                                                                                                                                              | Reference             |
|---------------------------|---------------|----------------------------------------------------------------------------------------------------------------------------------------------------------------------------------------------------------------------------------------------------------------------------------------------|-----------------------|
| <i>E. coli</i> TOP10      |               | F <sup>-</sup> , <i>mcrA</i> Δ( <i>mrr-hsdRMS-mcrBC</i> ), φ80 <i>lacZ</i> , Δ <i>M15</i> , Δ <i>lacX74</i> , <i>recA1</i> , <i>araD139</i> , Δ( <i>ara-leu</i> )7697, <i>galU</i> , <i>galK</i> , <i>rpsL</i> , <i>endA1</i> , <i>mup</i>                                                   | Invitrogen            |
| <i>E. coli</i> BL21 (DE3) |               | F <sup>-</sup> , <i>ompT</i> , <i>gal</i> , <i>dcm</i> , <i>lon</i> , <i>hsdS<sub>B</sub></i> ( <i>r<sub>B</sub> m<sub>B</sub></i> ), λ(DE3 [ <i>lacI</i> , <i>lacUV5-T7p07</i> , <i>ind1</i> , <i>sam7</i> , <i>nin5</i> ]), [ <i>malB</i> <sup>+</sup> ] <sub>K-12</sub> (λ <sup>S</sup> ) | Novagen               |
| <i>E. coli</i> DH5α       |               | F <sup>-</sup> Δ( <i>lacZYA-argF</i> )U169, <i>recA1</i> , <i>endA1</i> , <i>hsdR17</i> , <i>thi-1</i> , <i>gyrA96</i> , <i>relA1</i>                                                                                                                                                        | Laboratory collection |
| <i>E. coli</i> DHM1       |               | F <sup>-</sup> , <i>cya-</i> , <i>recA1</i> , <i>endA</i> , <i>gyrA96</i> , <i>thi-1</i> , <i>hsdR17</i> , <i>spoT1</i> , <i>rfbD1</i> , <i>cya-854</i>                                                                                                                                      | 1                     |
| Plasmids                  | ID collection | Characteristics                                                                                                                                                                                                                                                                              | Reference             |
| pKT25                     | 283           | P15 origin, Plac, N-terminal T25 cyclase fragment, Kan <sup>R</sup>                                                                                                                                                                                                                          | 1                     |
| pUT18C                    | 282           | ColE1 origin, Plac, N-terminal T18 cyclase fragment, Ap <sup>R</sup>                                                                                                                                                                                                                         | 1                     |
| pUTM18C                   | 304           | Modified pUT18C with the first TM domain of OppB ( <i>E. coli</i> ) inserted downstream T18                                                                                                                                                                                                  | 2                     |
| pUTM18C-zip               | 305           | Modified pUT18C with the first TM domain of OppB ( <i>E. coli</i> ) inserted downstream T18, encoding a fragment of leucine zipper protein                                                                                                                                                   | 2                     |
| pKTM25-zip                | 306           | Modified pKT25 with the first TM domain OppB ( <i>E. coli</i> ) inserted downstream T25, encoding a fragment of leucine zipper protein                                                                                                                                                       | 2                     |
| pKT25-FpvG                | pAB9          | FpvG cloned into pKT25, downstream T25 sequence                                                                                                                                                                                                                                              | This study            |
| pKT25-FpvH                | pAB10         | FpvH cloned into pKT25, downstream T25 sequence                                                                                                                                                                                                                                              | This study            |
| pKT25-FpvK                | pAB11         | FpvK cloned into pKT25, downstream T25 sequence                                                                                                                                                                                                                                              | This study            |
| pKT25-pvdT                | pAB24         | pvdT cloned into pKT25, downstream T25 sequence                                                                                                                                                                                                                                              | This study            |
| pKT25-FpvD                | pAB25         | FpvD cloned into pKT25, downstream T25 sequence                                                                                                                                                                                                                                              | This study            |
| pKT25-FpvE                | pAB26         | FpvE cloned into pKT25, downstream T25 sequence                                                                                                                                                                                                                                              | This study            |
| pKT25-RetS                | 285           | RetS cloned into pKT25, downstream T25 sequence                                                                                                                                                                                                                                              | 3                     |
| pUT18C-FpvG               | pAB12         | FpvG cloned into pUT18C, downstream T18 sequence                                                                                                                                                                                                                                             | This study            |
| pUT18C-FpvH               | pAB13         | FpvH cloned into pUT18C, downstream T18 sequence                                                                                                                                                                                                                                             | This study            |
| pUT18C-FpvK               | pAB14         | FpvK cloned into pUT18C, downstream T18 sequence                                                                                                                                                                                                                                             | This study            |
| pUT18C-FpvD               | pAB27         | FpvD cloned into pUT18C, downstream T18 sequence                                                                                                                                                                                                                                             | This study            |
| pUT18C-FpvE               | pAB28         | FpvE cloned into pUT18C, downstream T18 sequence                                                                                                                                                                                                                                             | This study            |
| pUT18C-RetS               | 284           | RetS cloned into pUT18C, downstream T18 sequence                                                                                                                                                                                                                                             | 3                     |
| pKTM25-FpvJ               | pAB19         | FpvJ cloned into pKTM25-zip vector                                                                                                                                                                                                                                                           | This study            |
| pKTM25-FpvC               | pAB20         | FpvC cloned into pKTM25-zip vector                                                                                                                                                                                                                                                           | This study            |
| pUTM18C-FpvC              | pAB22         | FpvC cloned into pUTM18C                                                                                                                                                                                                                                                                     | This study            |
| pUTM18C-FpvF              | pAB23         | FpvF cloned into pUTM18C                                                                                                                                                                                                                                                                     | This study            |
| pUTM18C-FpvJ              | pAB21         | FpvJ cloned into pUTM18C                                                                                                                                                                                                                                                                     | This study            |
| pBAD24                    | 348           | pBR322 origin, Para, <i>araC</i> , Ap <sup>R</sup>                                                                                                                                                                                                                                           | 4                     |
| pBAD33                    | 349           | pACYC184 origin, Para, <i>araC</i> , Cm <sup>R</sup>                                                                                                                                                                                                                                         | 4                     |
| pRSFDuet-1                | 253           | RSF origin, pT7, Kan <sup>R</sup>                                                                                                                                                                                                                                                            | Novagen               |
| pCDFDuet-1                | 357           | CDF origin, pITG, <i>lacI</i> , Strep <sup>R</sup>                                                                                                                                                                                                                                           | Novagen               |

|                                                |      |                                                                                                                |            |
|------------------------------------------------|------|----------------------------------------------------------------------------------------------------------------|------------|
| pBAD24-FpvG <sub>His6</sub>                    | pAB2 | FpvG cloned into pBAD24 with C-terminal His <sub>6</sub> sequence                                              | This study |
| pBAD33-FpvH <sub>Strep</sub>                   | pAB3 | FpvH cloned into pBAD33 with C-terminal Strep sequence                                                         | This study |
| pCDF-FpvJ <sub>His6</sub> FpvF <sub>Flag</sub> | pAB6 | FpvJ and FpvF cloned into MCS1 of pCDFDuet-1 with C-terminal His <sub>6</sub> and Flag sequence, respectively. | This study |
| pCDF-FpvJ <sub>His6</sub>                      | pAB5 | FpvJ cloned into MCS1 of pCDFDuet-1 with C-terminal His <sub>6</sub> sequence                                  | This study |
| pRSF-FpvC <sub>HA</sub>                        | pAB7 | FpvC cloned into MCS2 of pRSFDuet-1 with C-terminal HA sequence                                                | This study |
| pCDF-FpvF <sub>Flag</sub>                      | pAB8 | FpvF cloned into MCS1 of pCDFDuet-1 with C-terminal Flag sequence                                              | This study |

**Table S1 Strains and plasmids used in this study**

| Two-hybrid plasmids                 | ID collection | Sequence (5' → 3')                                                    |
|-------------------------------------|---------------|-----------------------------------------------------------------------|
| pKT25-FpvGUP                        | 1159          | CCGGTCTAGAGATGTCGAAAAAGTCCCCTCCAGA                                    |
| pKT25-FpvGDO                        | 1160          | CCGGGGTACCCGTGGCTGTCCCTCCGCGGTCTGGTT                                  |
| pKT25-FpvHUP                        | 1161          | CCGGTCTAGAGATGAGCAAGGCCGCCGTTGCCAG                                    |
| pKT25-FpvHDO                        | 1162          | CCGGGGTACCCGTTGCTTACCTCGTTTGTTCAGCCA                                  |
| pKT25-FpvKUP                        | 1177          | CCGGTCTAGAGATGAGCGTCGAAACCGTCCGCCCG                                   |
| pKT25-FpvKDO                        | 1178          | CCGGGTACCCGATGGCGGTGCTGACGGGTACAGCC                                   |
| pKT25-FpvDUP                        | 1197          | CCGGTCTAGAGATGAGCATCCACACCCGCCCTGG                                    |
| pKT25-FpvDDO                        | 1198          | CCGGGTACCCGTGGCGCGGCGATGTCGGCGTGGTC                                   |
| pKT25-FpvEUP                        | 1199          | CCGGTCTAGAGATGAACGACGCCTACGAACAACCTG                                  |
| pKT25-FpvEDO                        | 1200          | CCGGTCTAGAGATGAACGACGCCTACGAACAACCTG                                  |
| pKT25-pvdTUP                        | 1410          | CCGGTCTAGAGATGAAAAACGCCACGCAACCCGTC                                   |
| pKT25-pvdTDO                        | 1411          | CCGGGGTACCCGTTGGCTGGCCAGGCGGCCACCGG                                   |
| pKTM25-FpvCUP                       | 1408          | CCGGTCTAGAGGAAGACGGCAAACGCCTGCGCATC                                   |
| pKTM25-FpvCDO                       | 1202          | CCGGGAGCTCTCATGCGCCGACTCCTGGATGGC                                     |
| pUTM18C-FpvCDO                      | 1400          | CCGGGGTACCCGTGCGCCGACTCCTGGATGGCGCG                                   |
| pKTM25-FpvJUP                       | 1397          | CCGGTCTAGAGCACAAACCCGATGCGAATGCGAG                                    |
| pKTM25-FpvJDO                       | 1201          | CCGGGAATTCTCATGGCGCGGCGATGTCGGCGTGTG                                  |
| pUTM18C-FpvJDO                      | 1212          | CCGGGGTACCCGTGGCGCGGCGATGTCGGCGTGGTC                                  |
| pUTM18C-FpvFUP                      | 1399          | CCGGTCTAGAGGCGACGCCGCGCGGCCAGTCC                                      |
| pUTM18C-FpvFDO                      | 1203          | CCGGGGTACCCGTCAGCCCTTACCGCCAGCAGCCC                                   |
| <b>Proteins production plasmids</b> |               | <b>Sequence (5' → 3')</b>                                             |
| FpvG-p24HisCter_F                   | 1185          | CCGGCCATGGCCTCGAAAAAGTCCCCTCCAGACTC                                   |
| FpvG-p24HisCter_R                   | 1186          | CCGGAAGCTTTCAATGATGATGATGATGATGGCTAGCTGGCTGTCCCTCCGCGGTCTGGTT         |
| FpvH-p33StrepCter_F                 | 1189          | CCGGAATTCAAGGAGATATACATATGAGCAAGGCCGCCGTTGCCAGCCC                     |
| FpvH-p33StrepCter_R                 | 1190          | CCGGAAGCTTTCAATTTTCGAACTGCGGGTGGCTCCAGCTAGCTTGTACCTCGTTTGTTCAGCCA     |
| FpvJ-pCDFHisCter_F                  | 1404          | CCGGCCATGGGACGATCCACACCCGCCCTGGCGC                                    |
| FpvJ-pCDFHisCter_R                  | 1405          | CCGGAATTCTCAATGATGATGATGATGATGGCTAGCTGGCGCGGCGATGTCGGCGTGGTC          |
| FpvF-pCDFFlagCter_F                 | 1406          | CCGGAAGCTTTCAATTGTCGTCATCGTCTTTGTAGTCGCTAGCGCGCCCTTCGACTATCGC         |
| FpvF-pCDFFlagCter_R                 | 1407          | TTTCTGT                                                               |
| FpvC-pRSFHA Cter_F                  | 1408          | CCGGAGATCTAAGGAGATATACATATGCTGTTCTCCCGTCGCTCATCC                      |
| FpvC-pRSFHA Cter_R                  | 1409          | CCGGGGTACCTCAAGCGTAATCTGGAACATCGTATGGGTAGCTAGCTGCGCCGACTCCTGGATGGCGCG |

**Table S2: Oligonucleotides used in this study**

| Protein | Theoretical MW (KDa) | Theoretical MW with tag (KDa) |
|---------|----------------------|-------------------------------|
| FpvG    | 45                   | 46                            |
| FpvH    | 20                   | 21                            |
| FpvJ    | 11                   | 15                            |
| FpvF    | 32                   | 33                            |
| FpvC    | 34                   | 36                            |

**Table S3: Theoretical MW of the proteins tested for protein interactions in this study with and without tag.**

**A.**

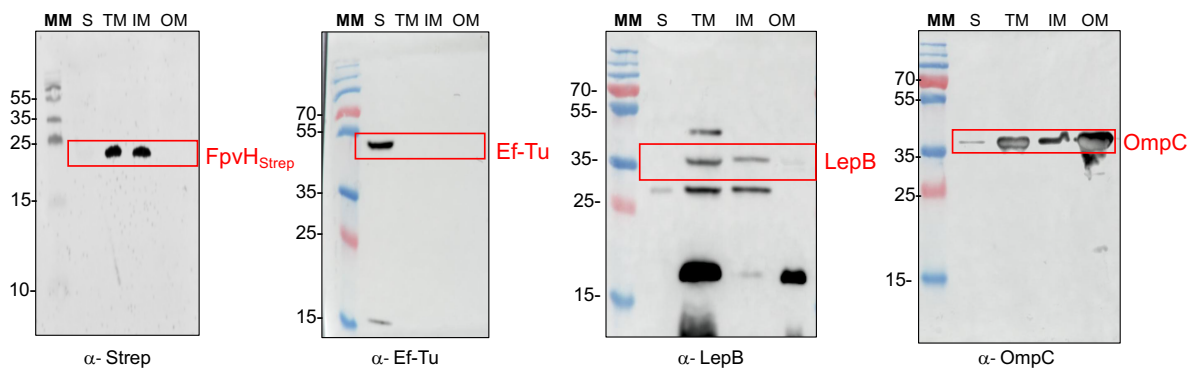

**B.**

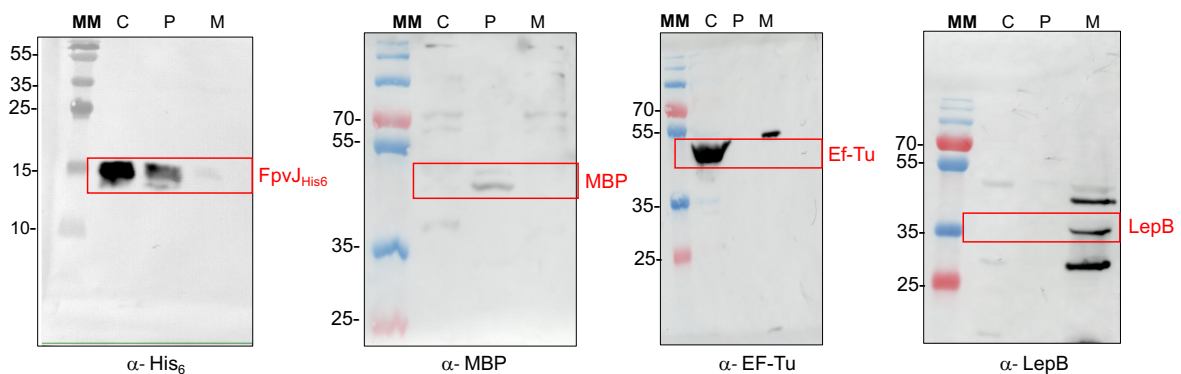

**Fig. S1. (A)** TOP10 cells producing FpvH<sub>Strep</sub> were harvested and membrane fractions were collected as described in Materials and Methods procedures. Samples were loaded onto a 12 % SDS-PAGE gel for immunodetection analysis. MM, molecular marker; S, soluble fraction; TM, Total membrane; IM, Inner membranes; OM, Outer membranes. To check for correct cell fraction antibody against specific cytoplasmic, inner and outer membrane proteins were used: anti-Ef-Tu for the soluble fraction (Ef-Tu

being a cytoplasmic protein); anti-LepB for the inner membrane fraction and anti-OmpC for the outer membrane fraction. Anti-Strep was used to detect FpvH<sub>Strep</sub>.

(B) BL21 (DE3) cells producing FpvJ<sub>His6</sub> were submitted to cellular fractionation. MM, molecular marker; P, periplasm, C, cytoplasm, TM, total membranes were collected and loaded onto a 15 % SDS-PAGE gel for immunodetection analysis. The molecular mass markers (kDa) are indicated on the left. To check for correct cell fractionation antibody against specific cytoplasmic, periplasmic and membrane proteins were used: anti-Ef-Tu for the cytoplasmic fraction; anti-MBP for the periplasmic fraction and anti-LepB for the membrane fraction. Anti-His was used to detect FpvJ<sub>His</sub>.

Ef-Tu is a cytoplasmic elongation factor, MBP (maltose binding protein) is a periplasmic binding protein involved in the uptake of maltodextrins, LepB an inner membrane peptidase, OmpC an outer membrane porin.

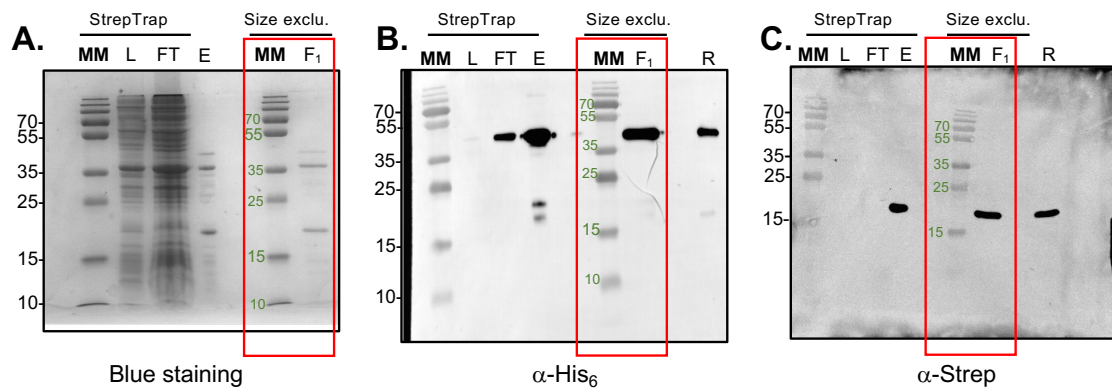

**Fig. S2: Original gels of SDS-PAGE and blots presented in Fig. 3.** FpvG-FpvH was first purified on a StrepTrap column and afterwards on a Size exclusion chromatography (Superdex 200 10/300 GL column). (A) SDS-PAGE of the purified complex analyzed by Coomassie blue staining. (B-C) Immunoblot analysis using specific anti-His (B) and anti-Strep antibodies (C). The molecular mass markers (kDa) are indicated on the left. MM, Molecular Marker (KDa); L, Load fraction loaded on the affinity Strep column; FT, Flow-through; E: Elution (containing FpvG and FpvH); GF: Fraction of the size-exclusion chromatography containing FpvG and FpvH; R, Positive control with bacteria expressing His-tagged FpvG (panel B) and Strep tag FpvH (panel C). In red are the fractions of SDS-PAGE and blots presented in Fig. 3. The predicted size of FpvG<sub>His6</sub> and FpvH<sub>Strep</sub> are 46 kDa and 21 kDa respectively.

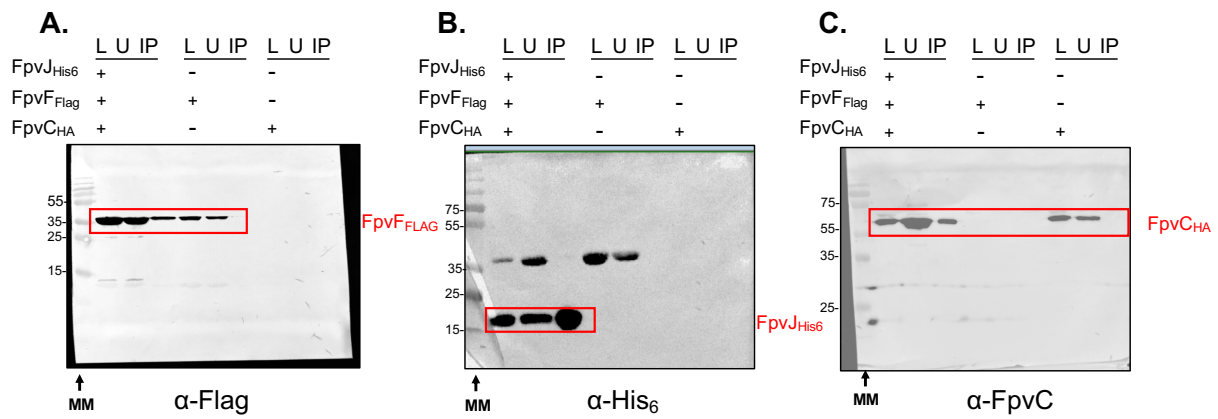

**Fig. S3: Original gels of blots presented in Figure 5.** Periplasmic fractions of BL21(DE3) cells co-expressing the indicated proteins FpvJ<sub>His6</sub>, FpvC<sub>HA</sub>, or FpvF<sub>Flag</sub> were incubated with anti-His beads. The loading (L), unbound (U), and immunoprecipitated (IP) fractions were separated by SDS-PAGE and analyzed by immunodetection using anti-Flag, anti-His<sub>6</sub> and anti-FpvC antibodies. The molecular mass markers (MM) are indicated on the left (kDa). In red are the fractions of blots presented in Figure 5. The predicted size of FpvJ<sub>His6</sub>, FpvF<sub>Flag</sub> and FpvC<sub>HA</sub> are 15 kDa, 33 kDa and 36 kDa respectively. FpvJ<sub>His6</sub> expressed in BL21(DE3) cells, copurifies with a unknown protein of around 37 kDa.

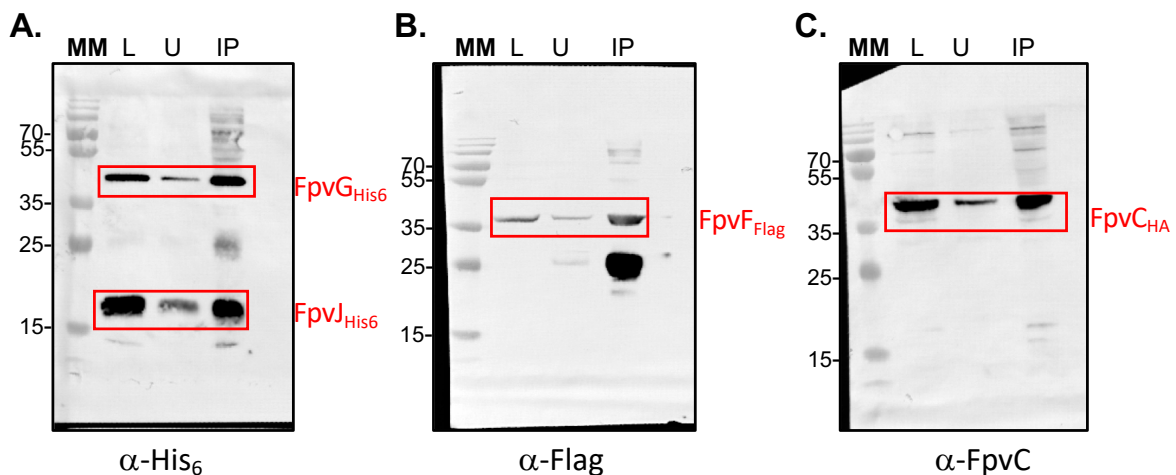

**Fig. S4: Original gels of blots presented in Figure 6.** Periplasmic fraction of BL21(DE3) cells and membrane fractions of TOP10 cells producing the indicated proteins FpvJ<sub>His6</sub>, FpvC<sub>HA</sub>, FpvF<sub>Flag</sub>, FpvG<sub>His6</sub>, and FpvH<sub>Strep</sub> were incubated with anti-Flag beads. The loading (L), unbound (U), and immunoprecipitated (IP) fractions were separated by SDS-PAGE and analyzed by immunodetection using anti-His<sub>6</sub> (panel A), anti-Flag (panel B) and anti-FpvC (panel C) antibodies. The molecular mass markers (MM) are indicated on the left (kDa). The predicted size are for FpvG<sub>His6</sub> 46 kDa, FpvH<sub>Strep</sub> 21 kDa, FpvJ<sub>His6</sub> 15 kDa, FpvF<sub>Flag</sub> 33 kDa and FpvC<sub>HA</sub> 36 kDa. In red are the fractions of blots presented in Figure 6.

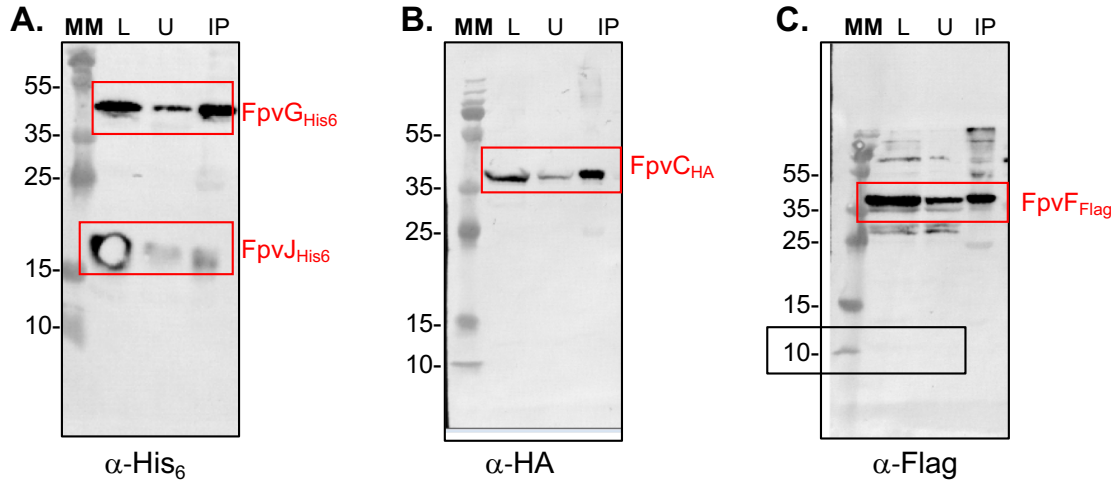

**Fig. S5. Pull-down assay of the FpvG-FpvJ-FpvC-FpvF complex in the presence of 10  $\mu$ M PVDI-Fe.** Periplasmic fractions of BL21(DE3) cells and membranes fractions of TOP10 cells producing the indicated proteins FpvJ<sub>His6</sub>, FpvC<sub>HA</sub>, FpvF<sub>Flag</sub>, FpvG<sub>His6</sub>, and FpvH<sub>Strep</sub> were incubated with anti-Flag beads as in Figure 6 except that 10  $\mu$ M PVDI-Fe was added. The loading (L), unbound (U), and immunoprecipitated (IP) fractions were separated by SDS-PAGE and analyzed by immunodetection using anti-His<sub>6</sub>, anti-FpvC, and anti-Flag antibodies. The molecular mass markers (kDa) are indicated on the left. The predicted size are for FpvG<sub>His6</sub> 46 kDa, FpvH<sub>Strep</sub> 21 kDa, FpvJ<sub>His6</sub> 15 kDa, FpvF<sub>Flag</sub> 33 kDa and FpvC<sub>HA</sub> 36 kDa.

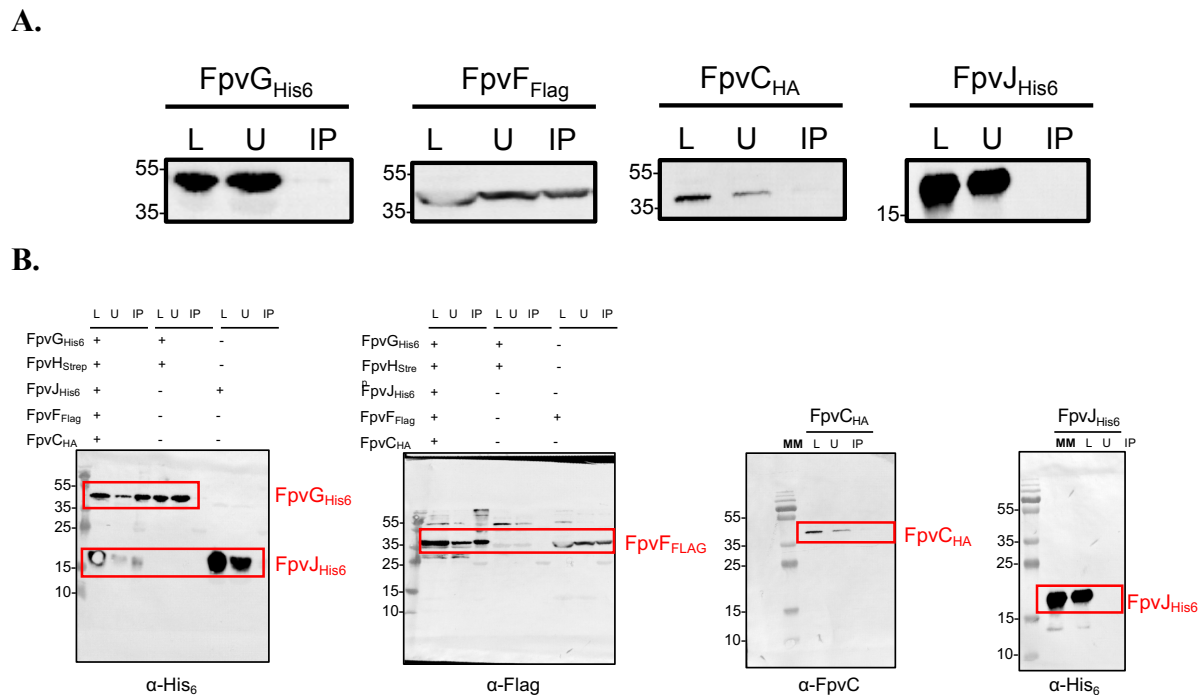

**Fig. S6:** (A) Negatives controls of the pull down assay presented in Fig. 6: periplasmic fractions of BL21(DE3) cells and membranes fractions of TOP10 cells producing the indicated proteins FpvF<sub>Flag</sub>, FpvC<sub>HA</sub>, FpvJ<sub>His6</sub> or FpvG<sub>His6</sub> were incubated with anti-Flag resin. The load (L), unbound (U) and immunoprecipitated (IP) fractions were separated by SDS-PAGE and analyzed in immunodetection by using anti-His<sub>6</sub>, anti-FpvC and anti-Flag antibodies. (B)

Originals gels presented in panel A and in the Fig S5. For both panels, the molecular mass markers (MM) are indicated on the left in kDa. The predicted size are for FpvG<sub>His6</sub> 46 kDa, FpvJ<sub>His6</sub> 15 kDa, FpvF<sub>Flag</sub> 33 kDa and FpvC<sub>HA</sub> 36 kDa.

### References

1. Karimova, G., Dautin, N. & Ladant, D. Interaction network among *Escherichia coli* membrane proteins involved in cell division as revealed by bacterial two-hybrid analysis. *J. Bacteriol.* **187**, 2233–2243 (2005).
2. Ouellette, S. P., Gaudiard, E., Antosová, Z. & Ladant, D. A Gateway(®) -compatible bacterial adenylate cyclase-based two-hybrid system. *Environ Microbiol Rep* **6**, 259–267 (2014).
3. Vincent, F. *et al.* Distinct oligomeric forms of the *Pseudomonas aeruginosa* RetS sensor domain modulate accessibility to the ligand binding site. *Environ. Microbiol.* **12**, 1775–1786 (2010).
4. Guzman, L. M., Belin, D., Carson, M. J. & Beckwith, J. Tight regulation, modulation, and high-level expression by vectors containing the arabinose PBAD promoter. *J Bacteriol* **177**, 4121–4130 (1995).
